# Supplementary material for: Combinatorial synthesis of spiro[indoline-3,2′-pyrrole] derivatives via a three-component reaction under catalyst-free conditions
Source: Royal Society of Chemistry journal article supplement (doi:10.1039/c5ra23860a), 2016-01-01

## Supporting Information

# Combinatorial Synthesis of Spiro[indoline-3,2'-pyrrole] Derivatives *via* a Three-component Reaction under Catalyst- free Conditions

Guanghao Shi, Xinwei He, Yongjia Shang\*, Meihua Xie\*

*The Key Laboratory of Functional Molecular Solids, Ministry of Education, Anhui Laboratory of Molecule-Based Materials, College of Chemistry and Materials Science, Anhui Normal University, Wuhu, Anhui 241000, P. R. China*

\* Corresponding author. Fax: +86-553-5910126.

E-mail: [shyj@mail.ahnu.edu.cn](mailto:shyj@mail.ahnu.edu.cn), [xiemh@mail.ahnu.edu.cn](mailto:xiemh@mail.ahnu.edu.cn)

## Table of Contents

X-Ray Crystallography Structures of Compounds **4b** -----S1

Copies of <sup>1</sup>H and <sup>13</sup>C NMR Spectra for Compounds **4a-4aa**-----S2-S21

## X-Ray Crystallography Structures of Compounds **4b**

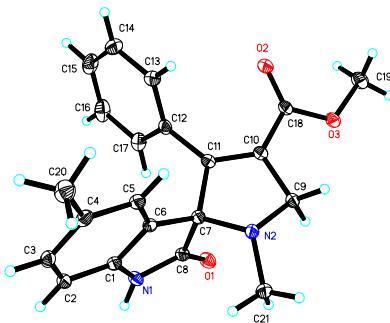

**Figure 1.** X-ray crystal structure of compound **4b**.

Crystal data for **4b**:  $C_{21}H_{20}N_2O_3$ ,  $M_r = 348.39$ , Monoclinic,  $a = 12.9571(10) \text{ \AA}$ ,  $b = 9.0882(8) \text{ \AA}$ ,  $c = 14.8304(2) \text{ \AA}$ ,  $\alpha = 90^\circ$ ,  $\beta = 92.225(2)^\circ$ ,  $\gamma = 90^\circ$ ,  $V = 1745.1(2) \text{ \AA}^3$ ,  $T = 133(2) \text{ K}$ , space group  $P21/n$ ,  $Z = 4$ , 12398 reflections collected, 3430 unique ( $R_{\text{int}} = 0.0213$ ) which were used in all calculation. The ellipsoid contour probability level in the caption is 30%.

Crystallographic data for compound **4b** reported in this paper have been deposited with the Cambridge Crystallographic Data Centre as supplementary publication no. CCDC-1436295.

# <sup>1</sup>H NMR and <sup>13</sup>C NMR Spectra of Compound 4a

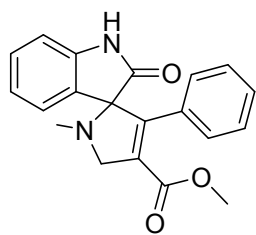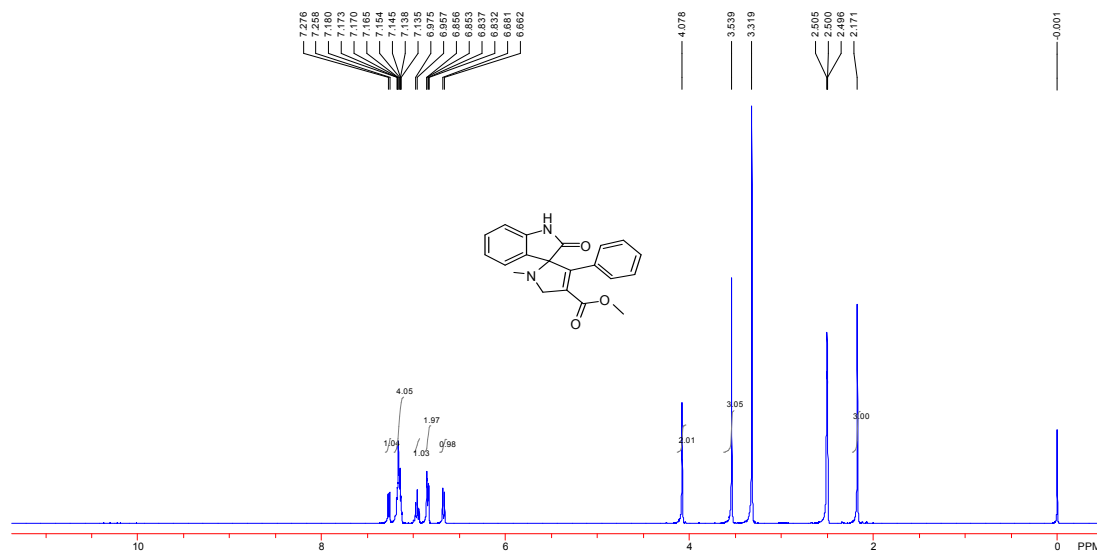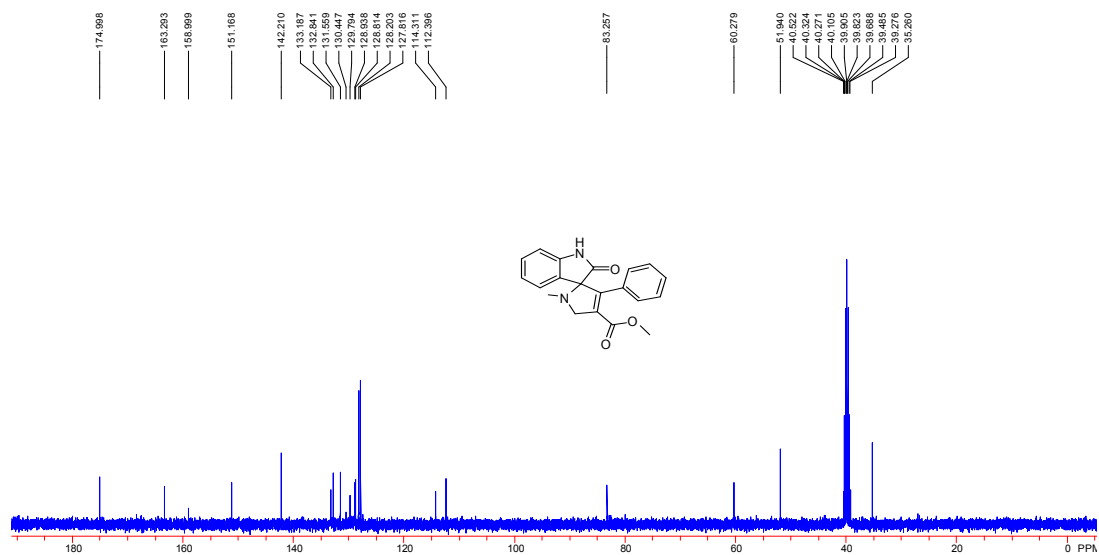

# <sup>1</sup>H NMR and <sup>13</sup>C NMR Spectra of Compound 4b

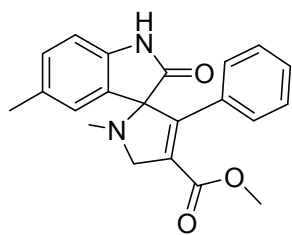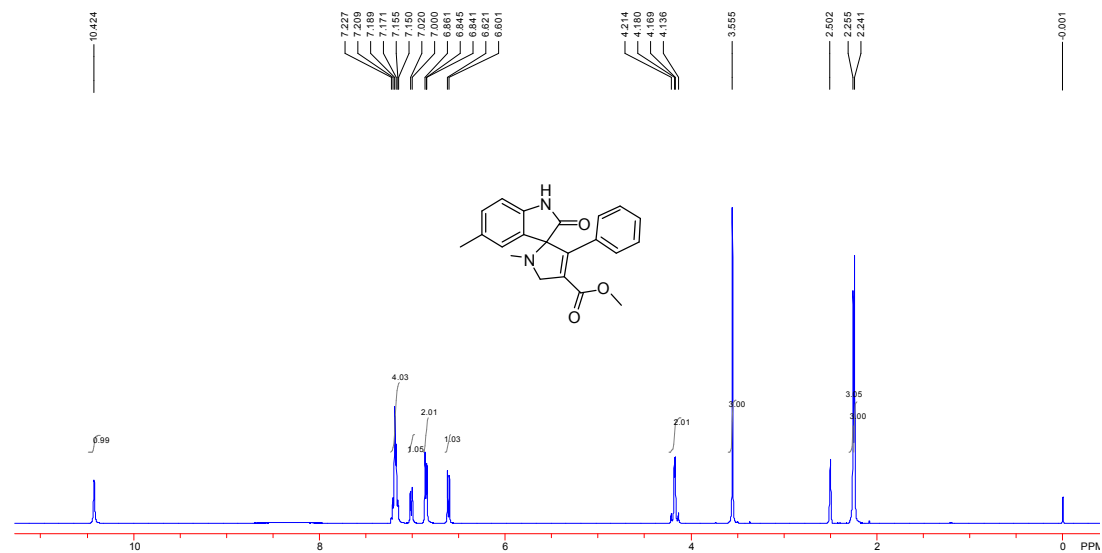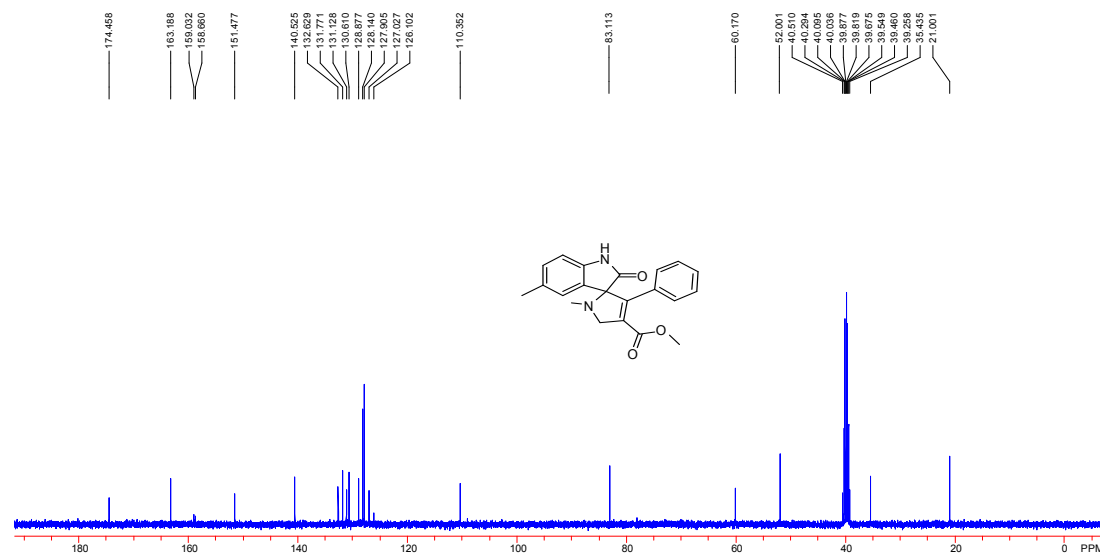

# <sup>1</sup>H NMR and <sup>13</sup>C NMR Spectra of Compound 4c

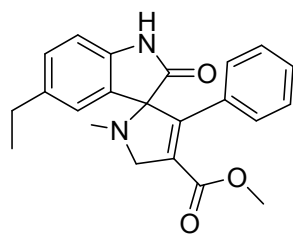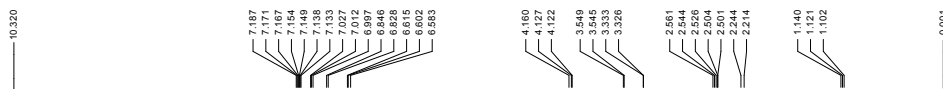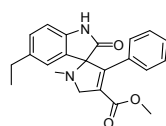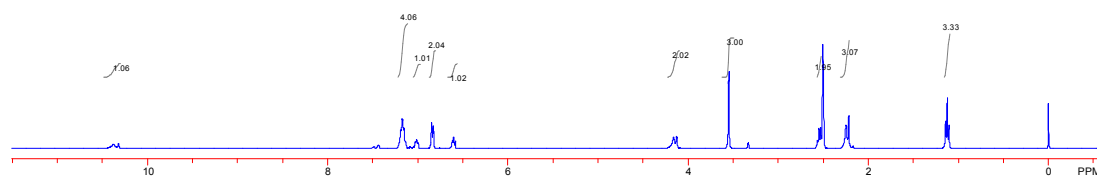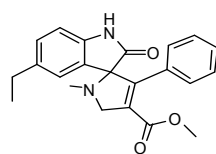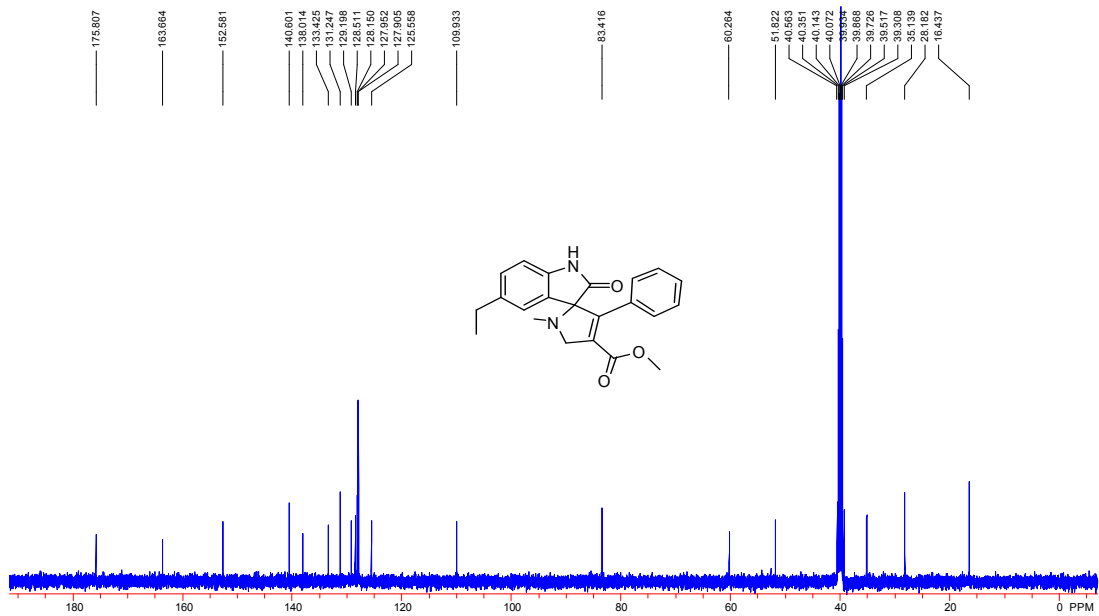

# <sup>1</sup>H NMR and <sup>13</sup>C NMR Spectra of Compound 4d

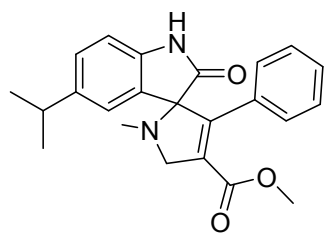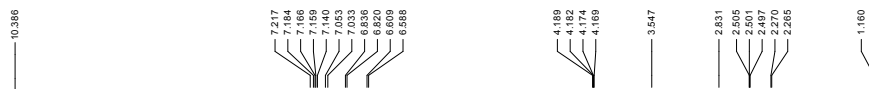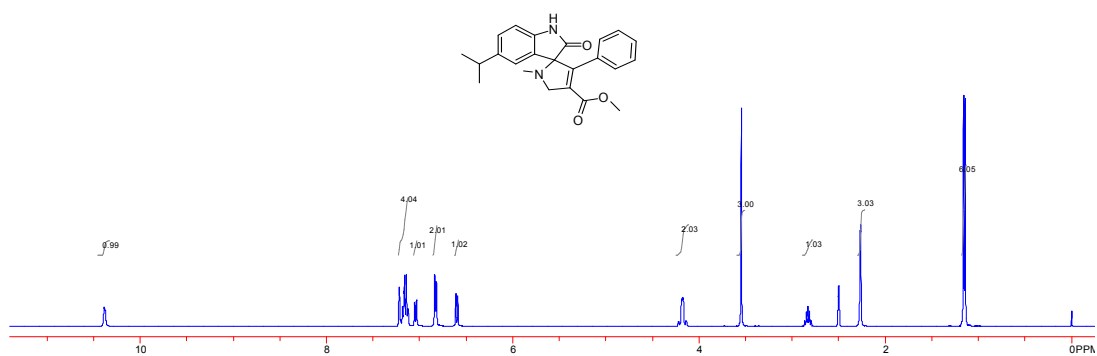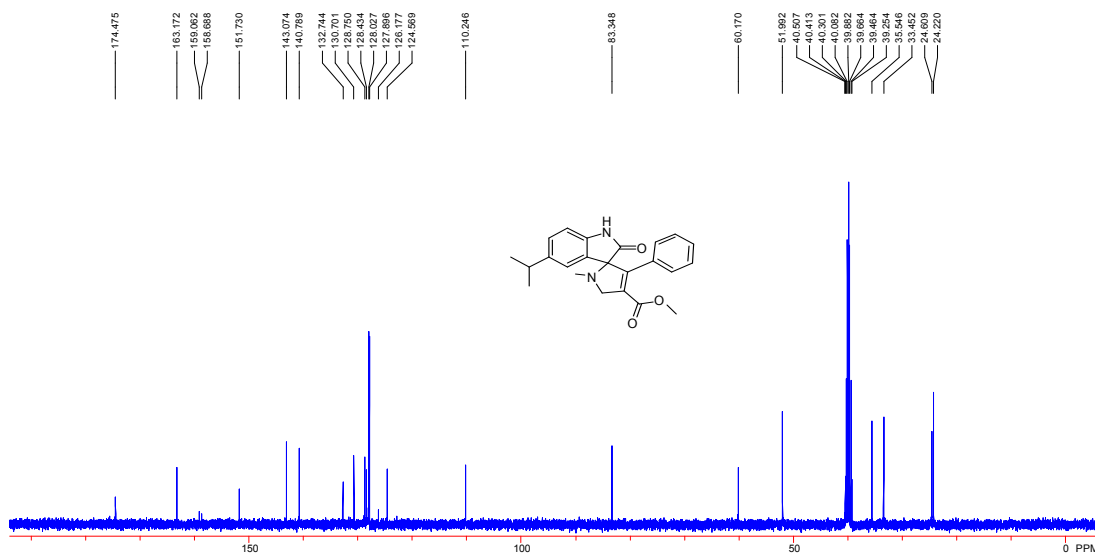

# <sup>1</sup>H NMR and <sup>13</sup>C NMR Spectra of Compound 4e

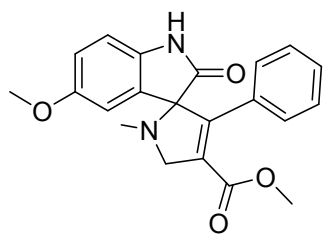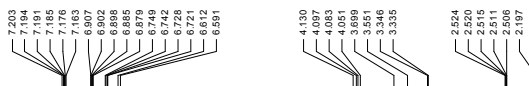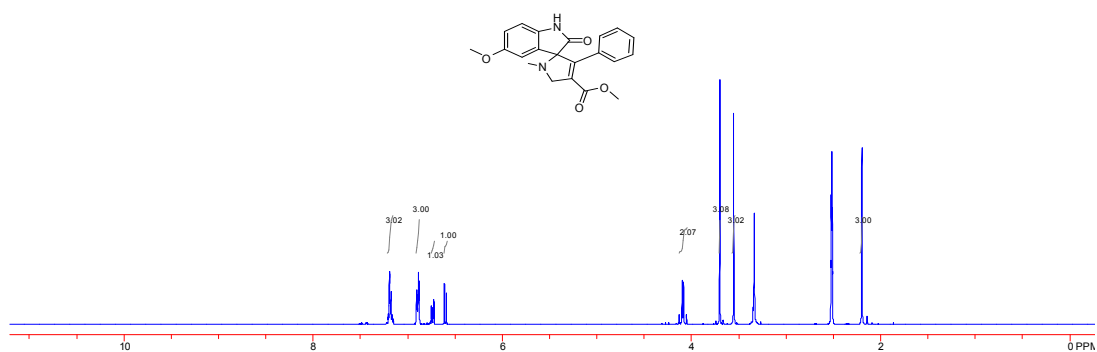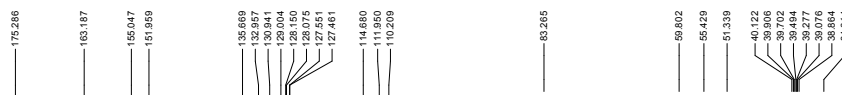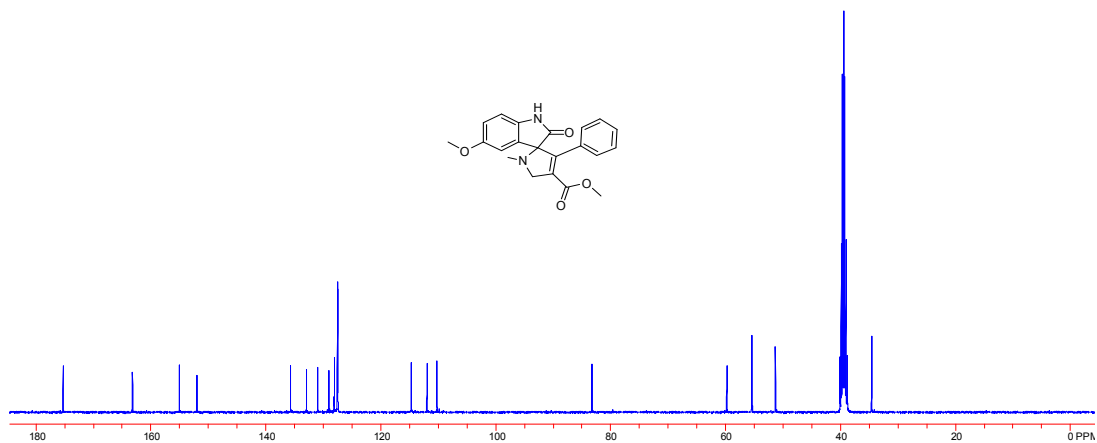

# <sup>1</sup>H NMR and <sup>13</sup>C NMR Spectra of Compound 4f

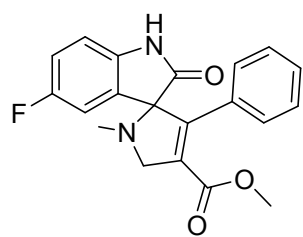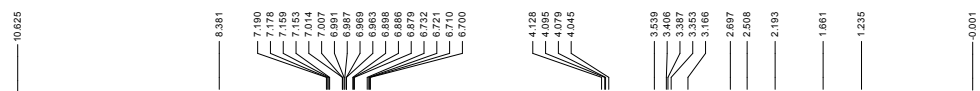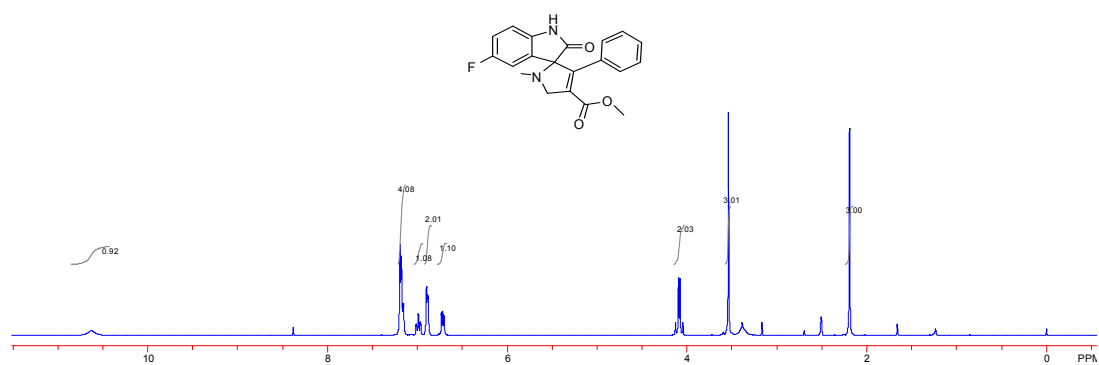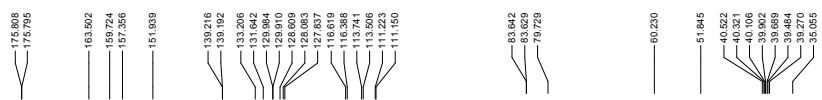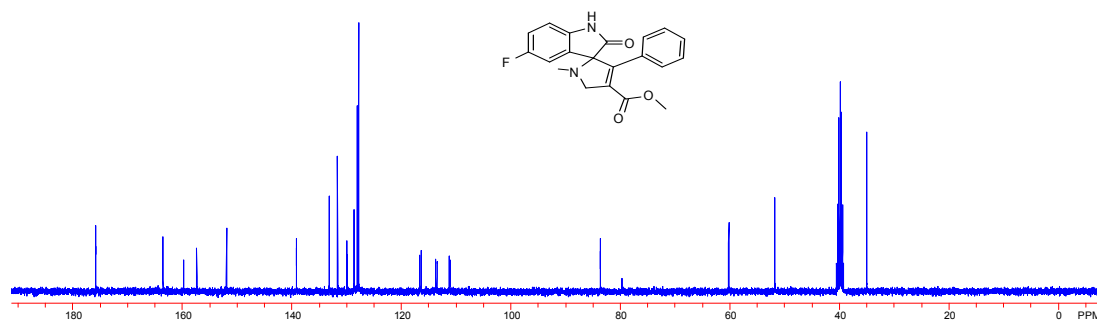



# <sup>1</sup>H NMR and <sup>13</sup>C NMR Spectra of Compound 4g

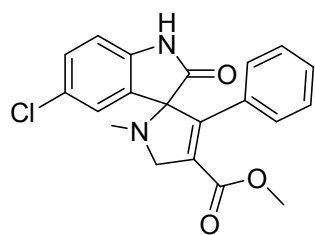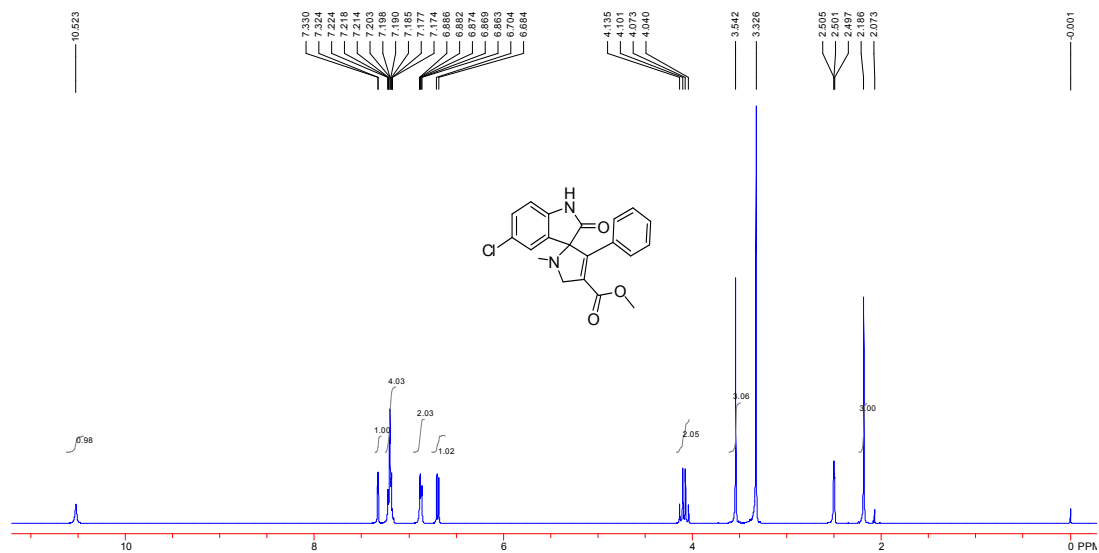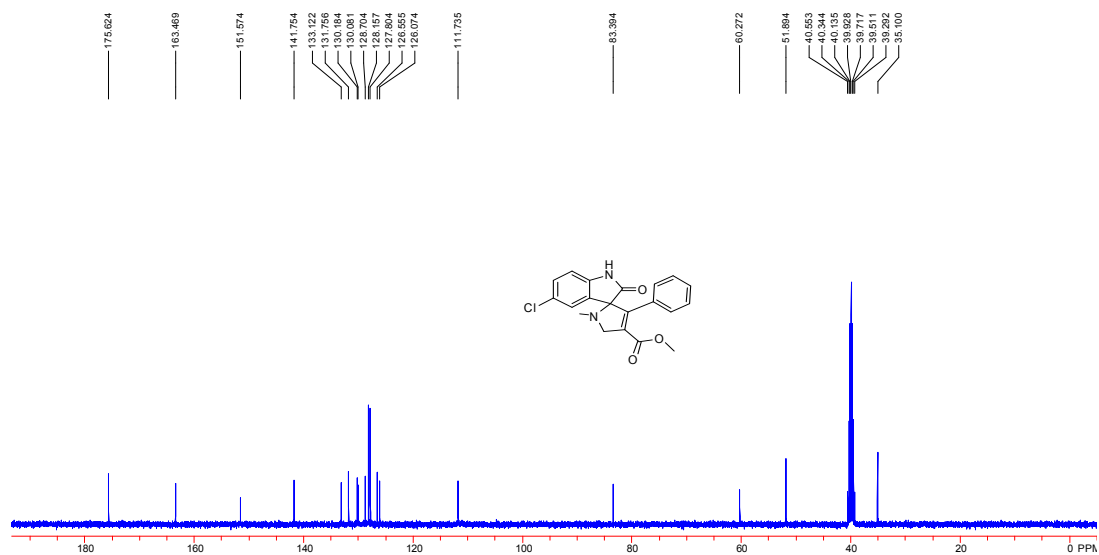

# <sup>1</sup>H NMR and <sup>13</sup>C NMR Spectra of Compound 4h

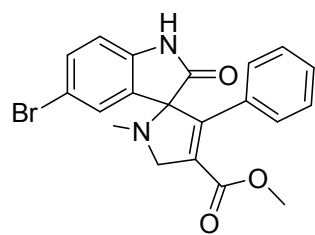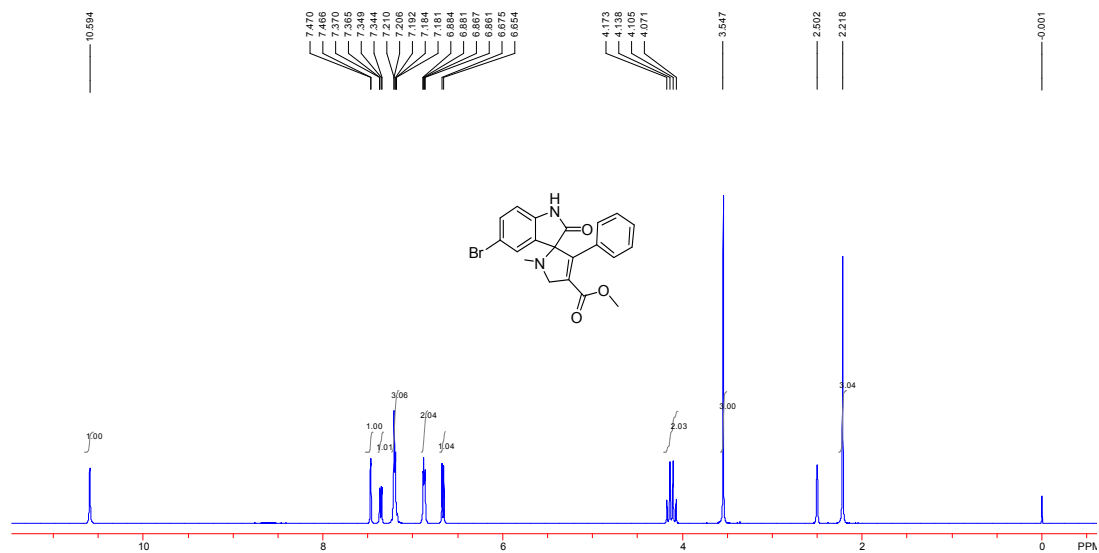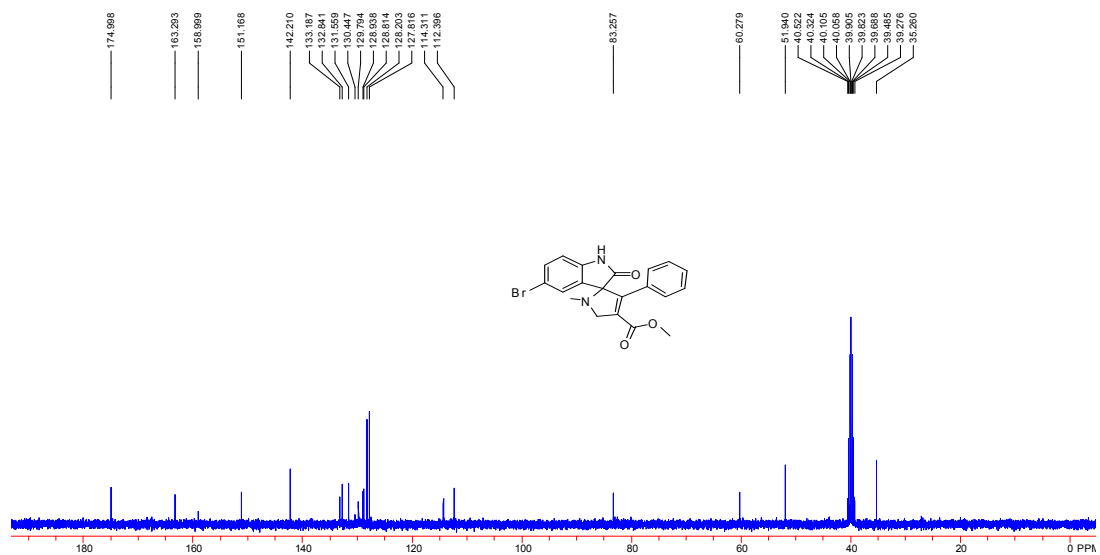

# <sup>1</sup>H NMR and <sup>13</sup>C NMR Spectra of Compound 4i

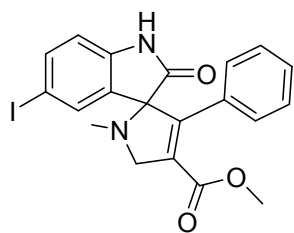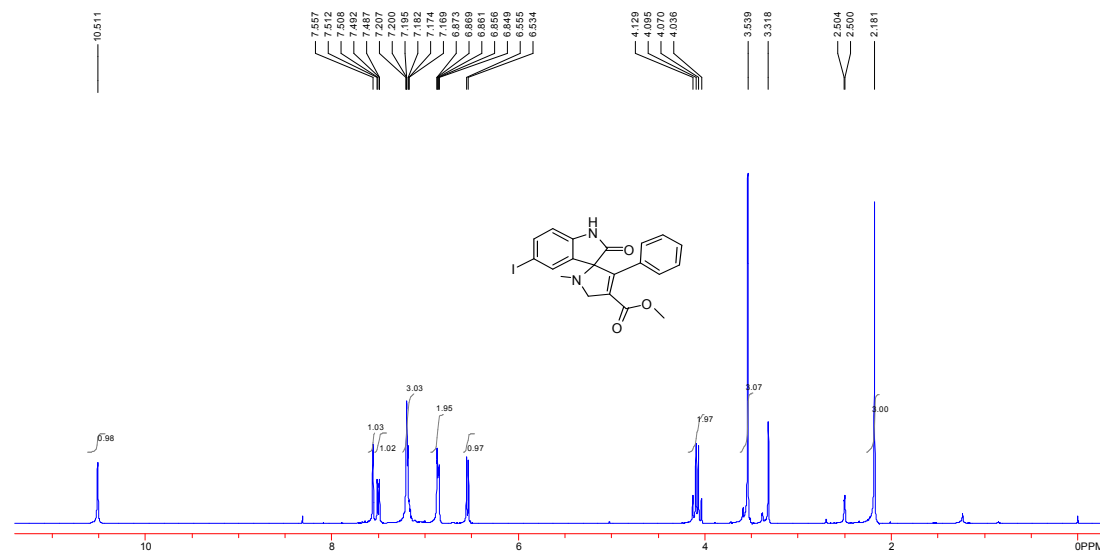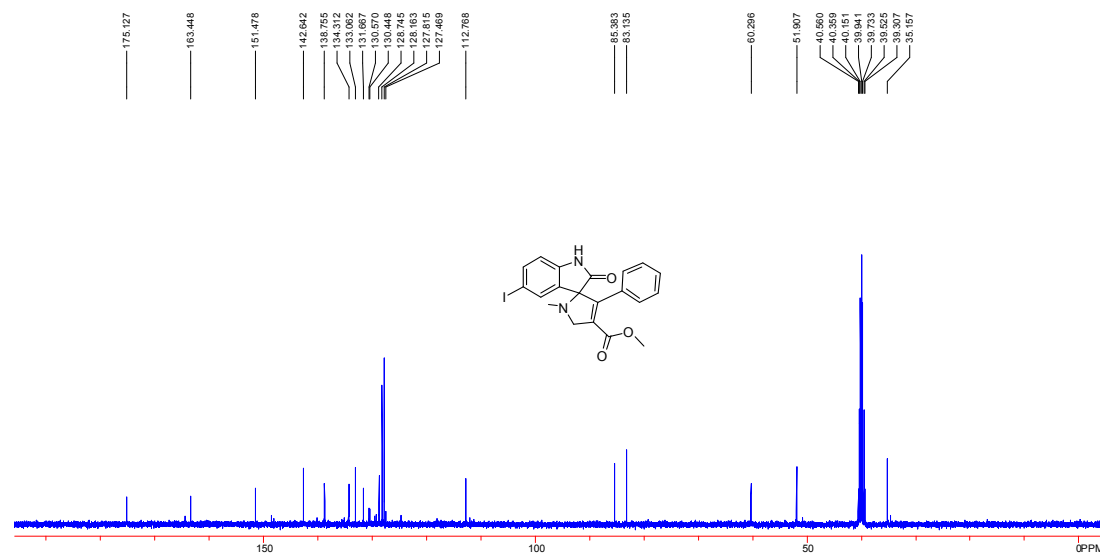

# $^1\text{H}$ NMR and $^{13}\text{C}$ NMR Spectra of Compound 4j

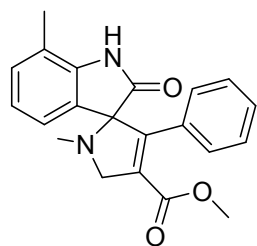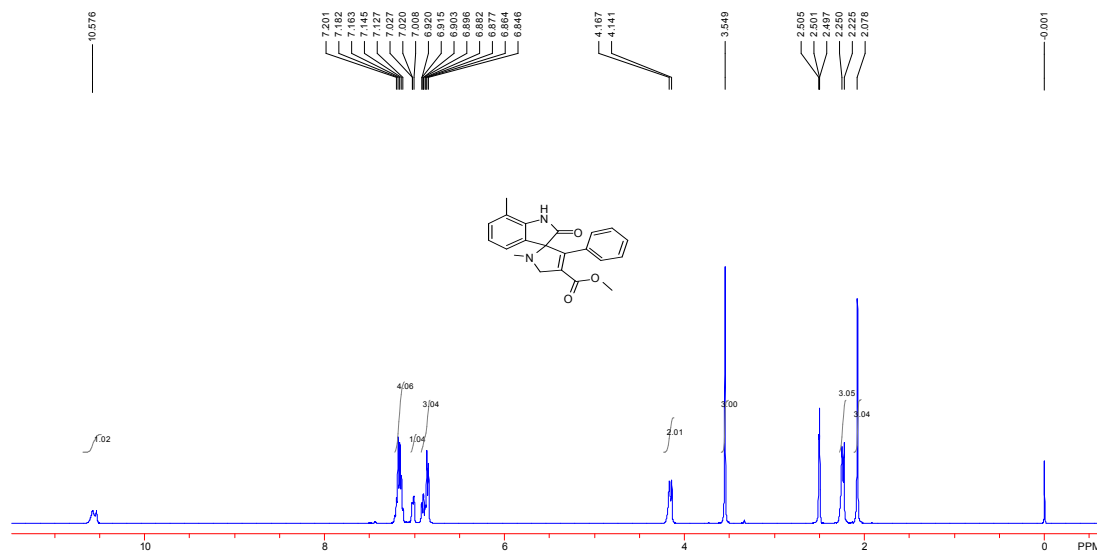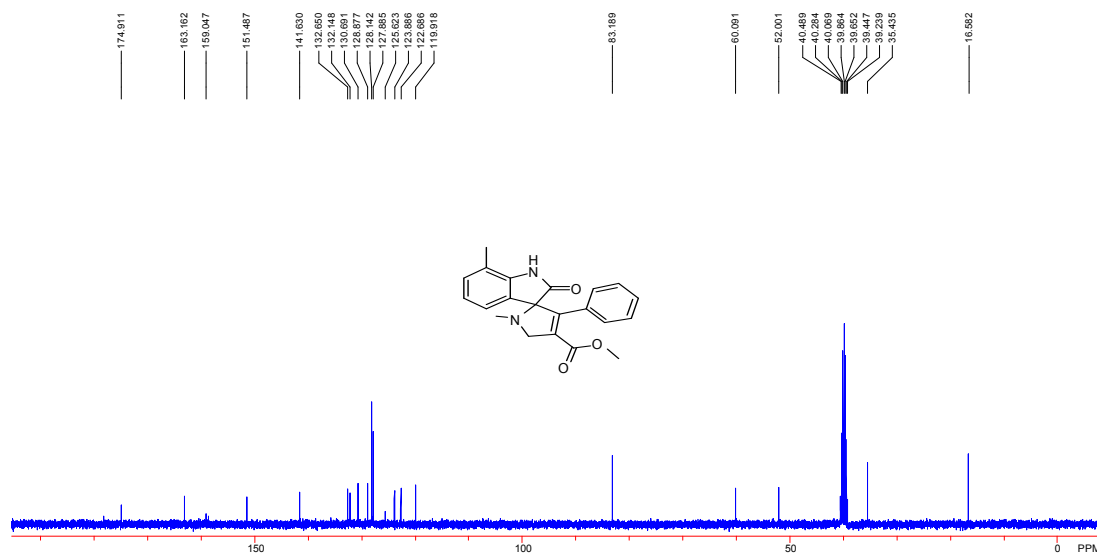

# <sup>1</sup>H NMR and <sup>13</sup>C NMR Spectra of Compound 4k

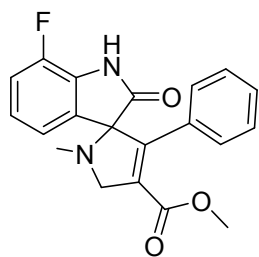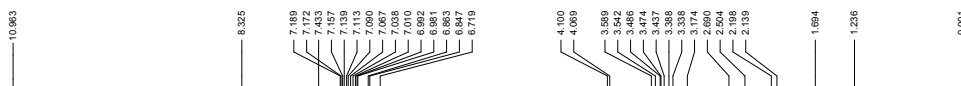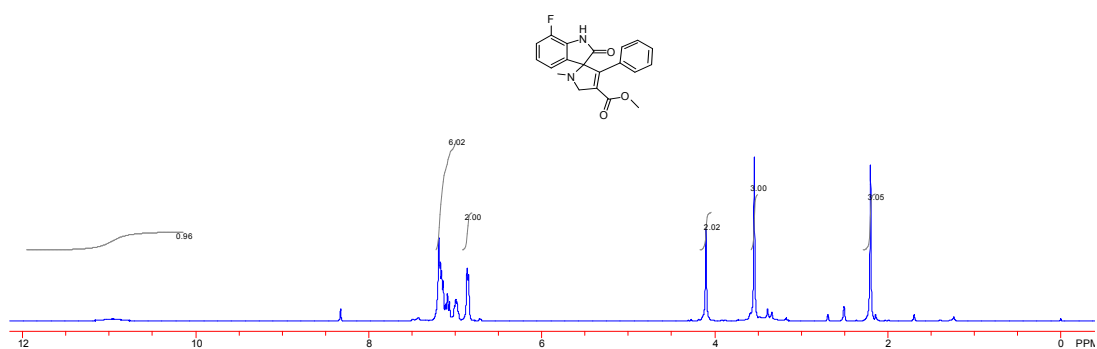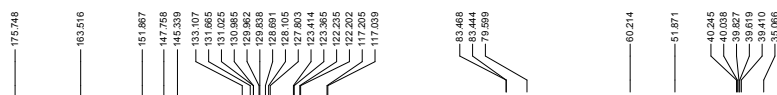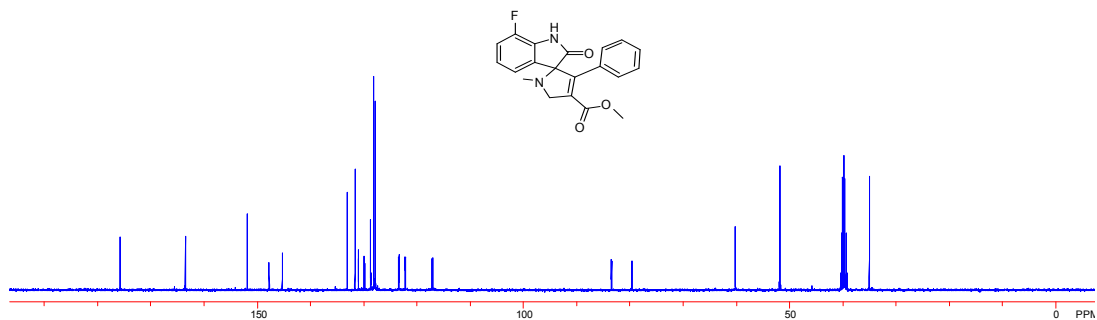

# <sup>1</sup>H NMR and <sup>13</sup>C NMR Spectra of Compound 4l

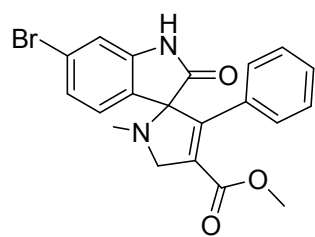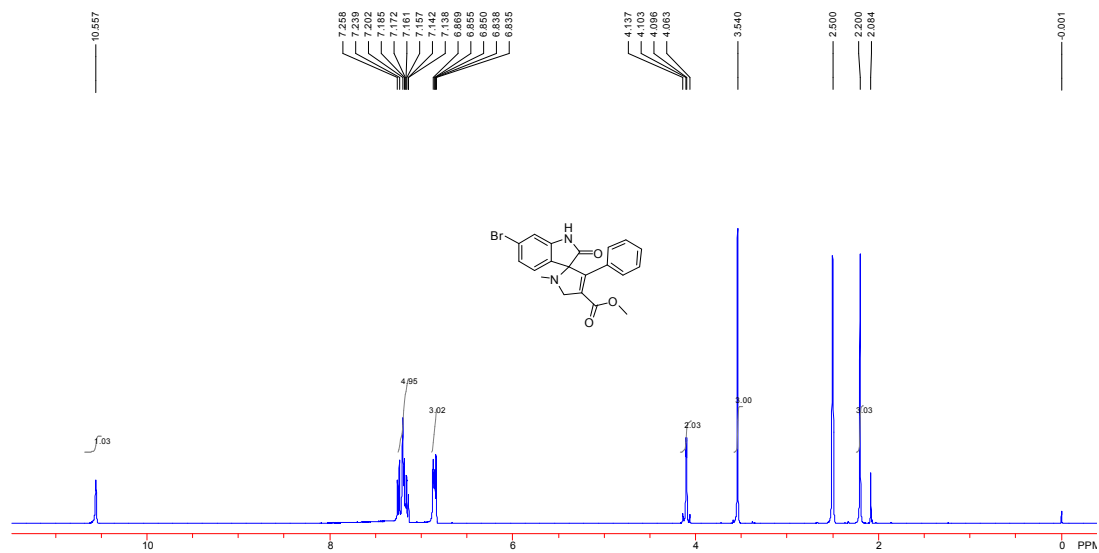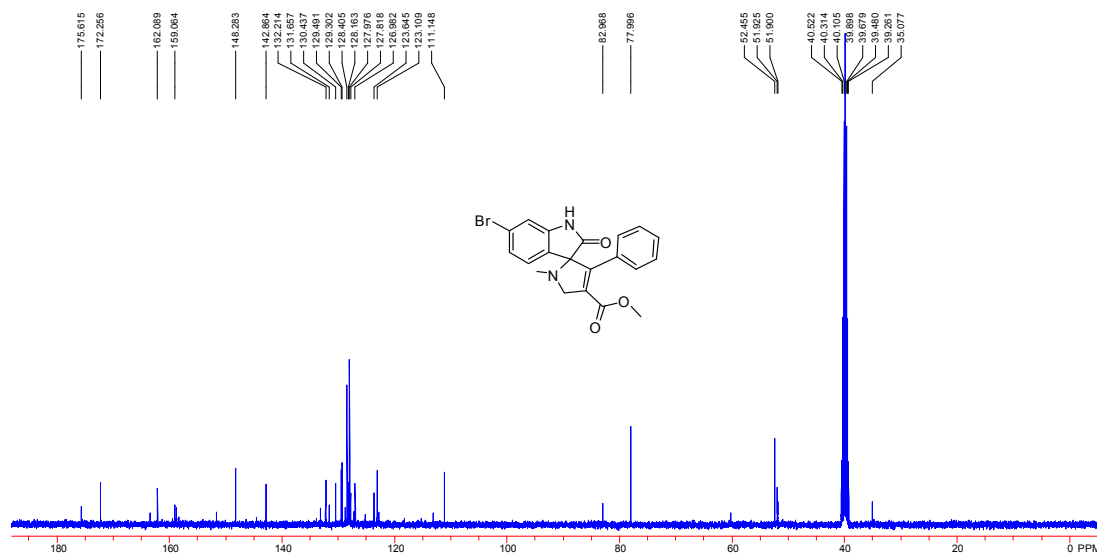

# $^1\text{H}$ NMR and $^{13}\text{C}$ NMR Spectra of Compound 4m

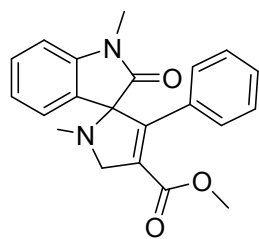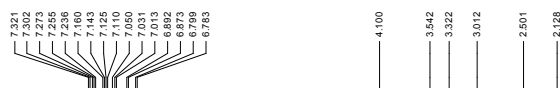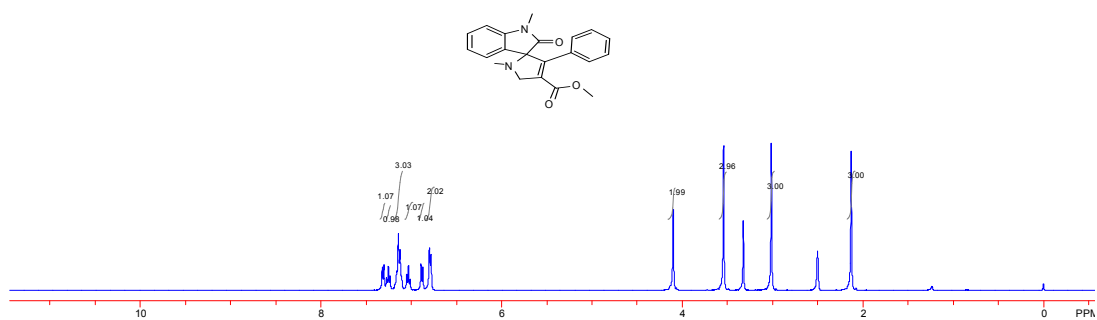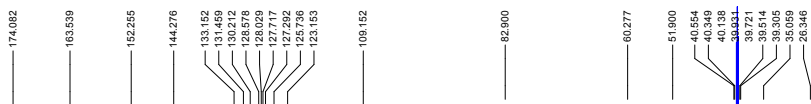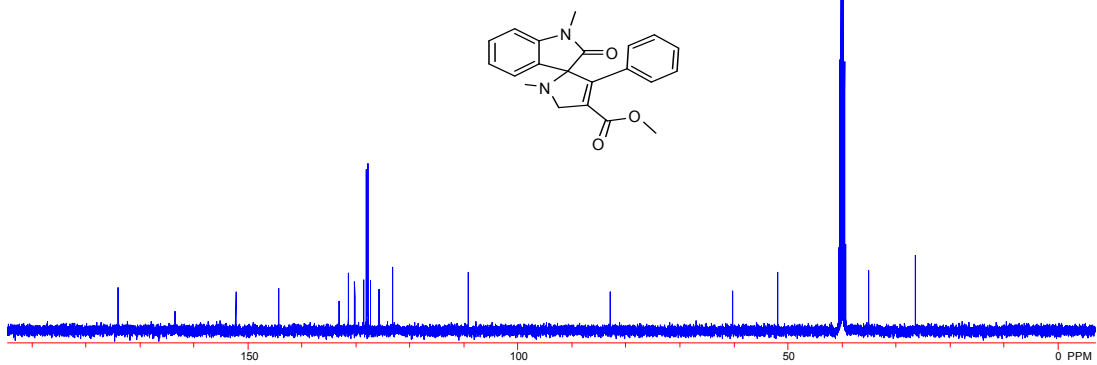

# <sup>1</sup>H NMR and <sup>13</sup>C NMR Spectra of Compound 4n

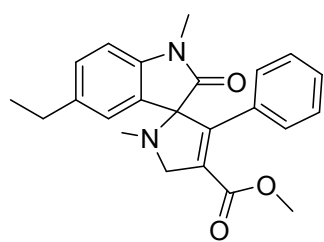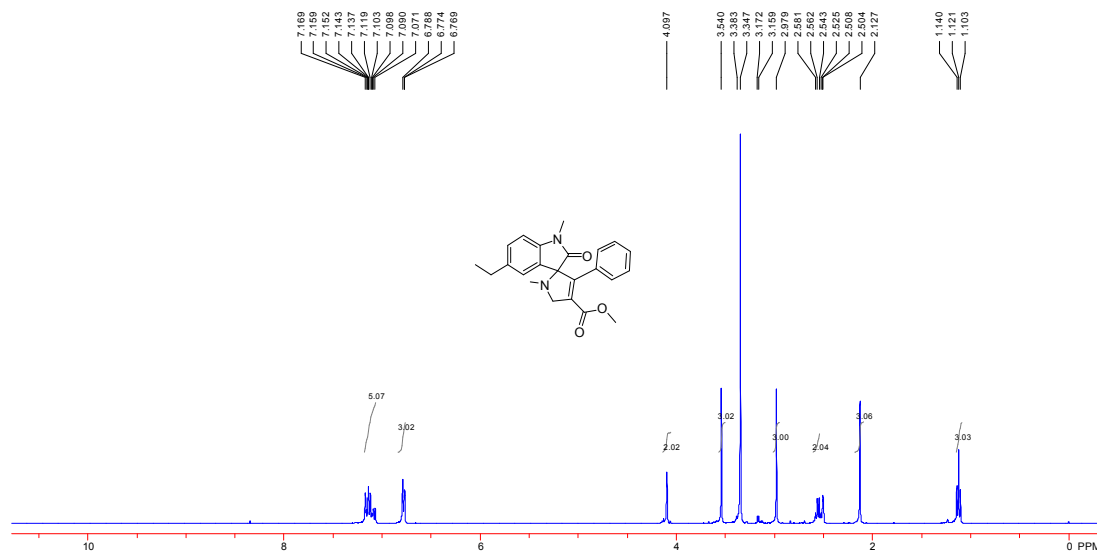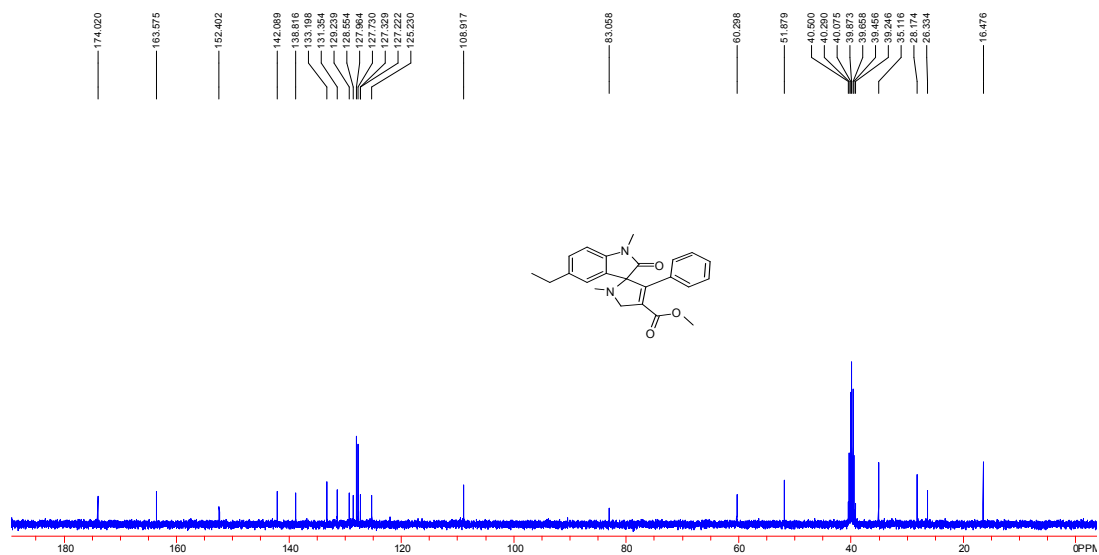



# <sup>1</sup>H NMR and <sup>13</sup>C NMR Spectra of Compound 4o

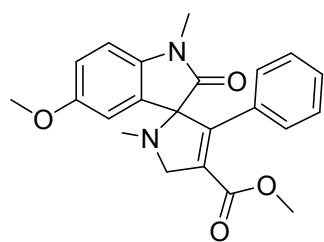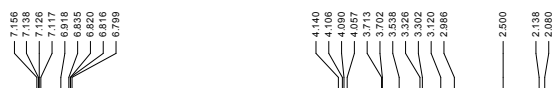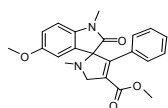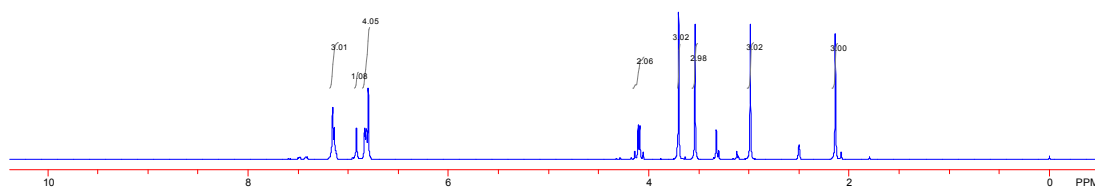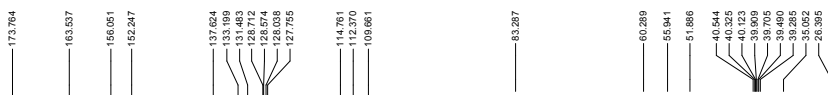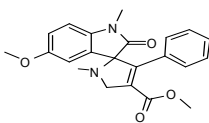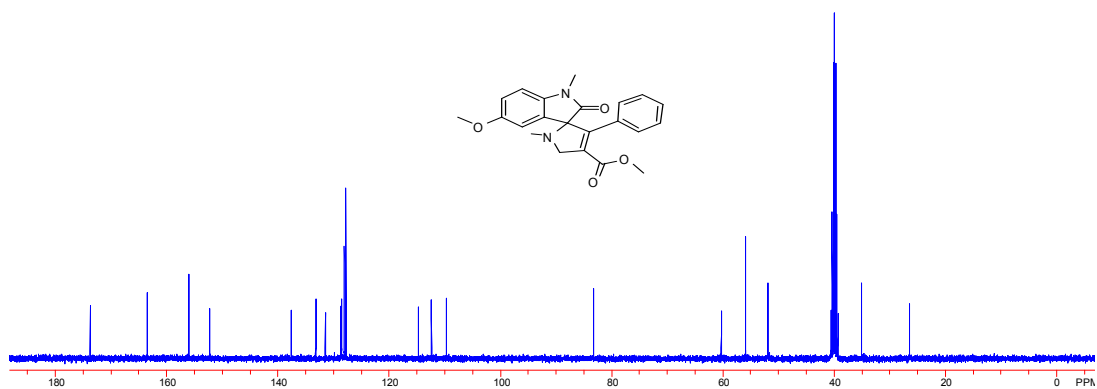

# <sup>1</sup>H NMR and <sup>13</sup>C NMR Spectra of Compound 4p

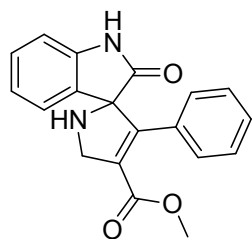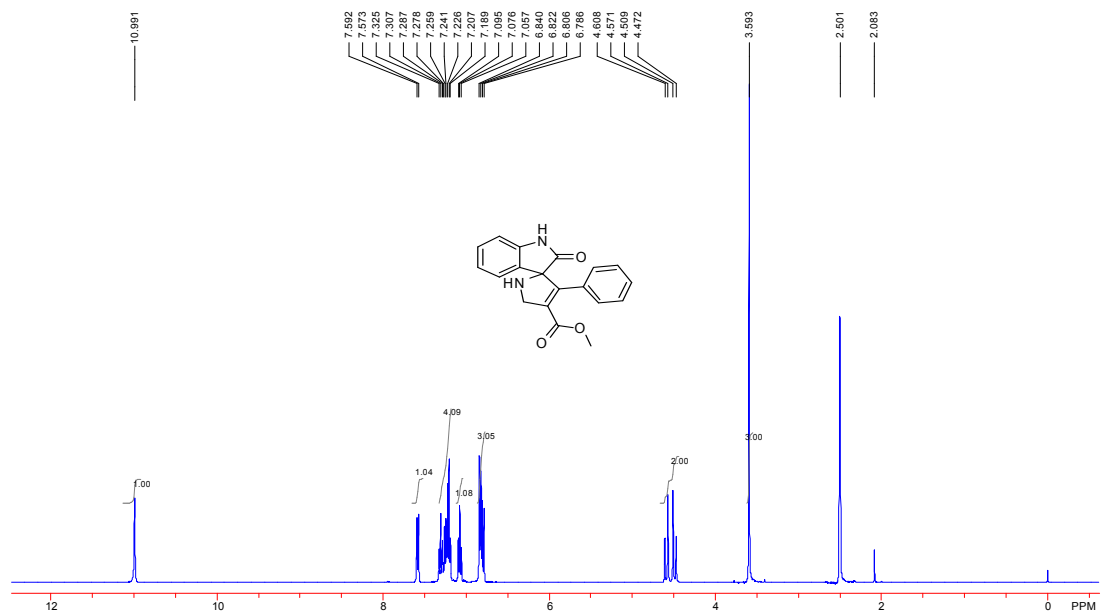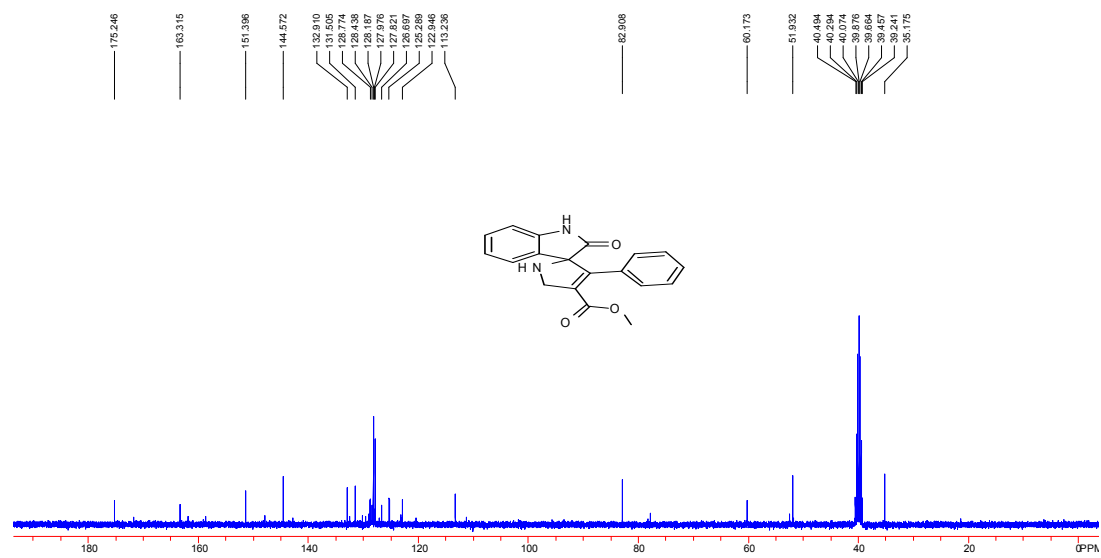

# <sup>1</sup>H NMR and <sup>13</sup>C NMR Spectra of Compound 4q

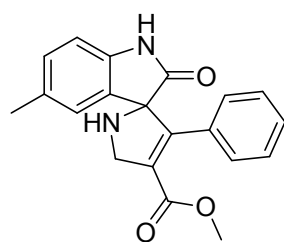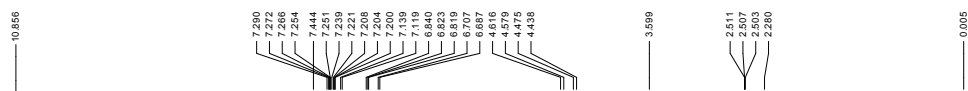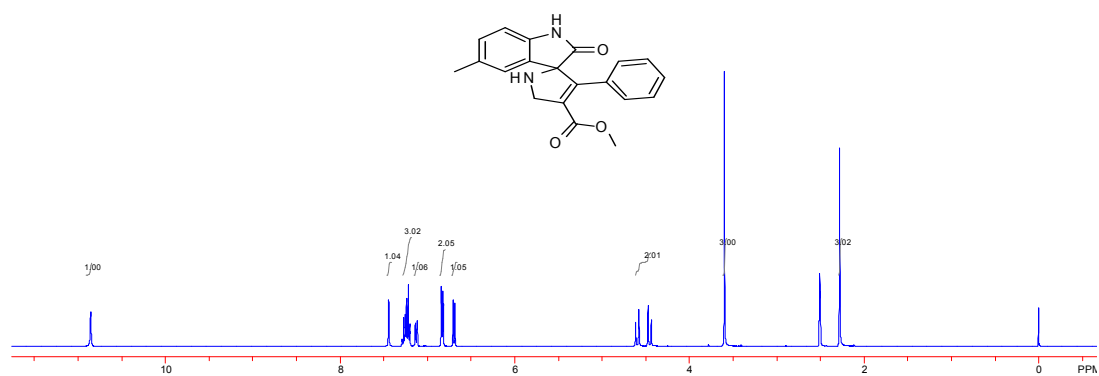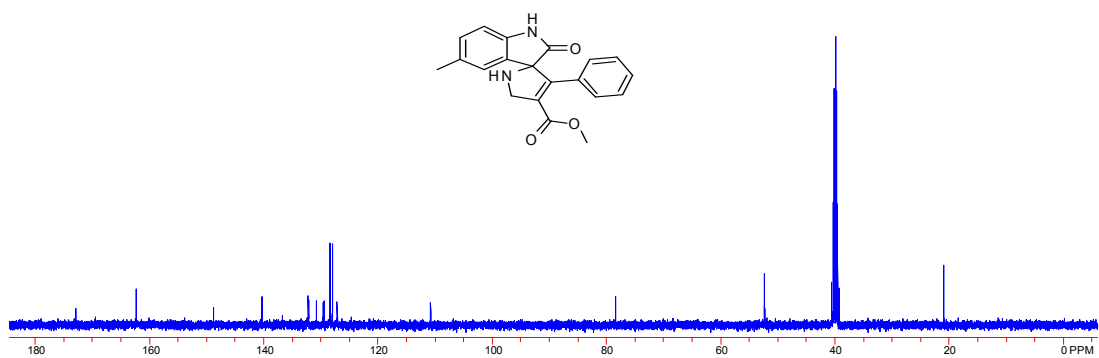

# $^1\text{H}$ NMR and $^{13}\text{C}$ NMR Spectra of Compound 4r

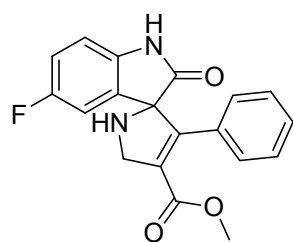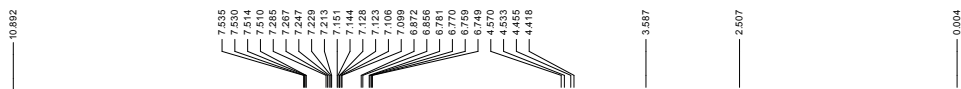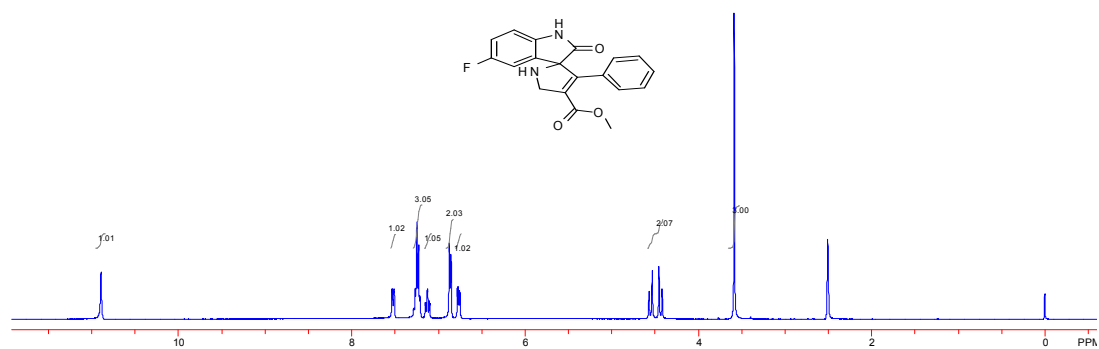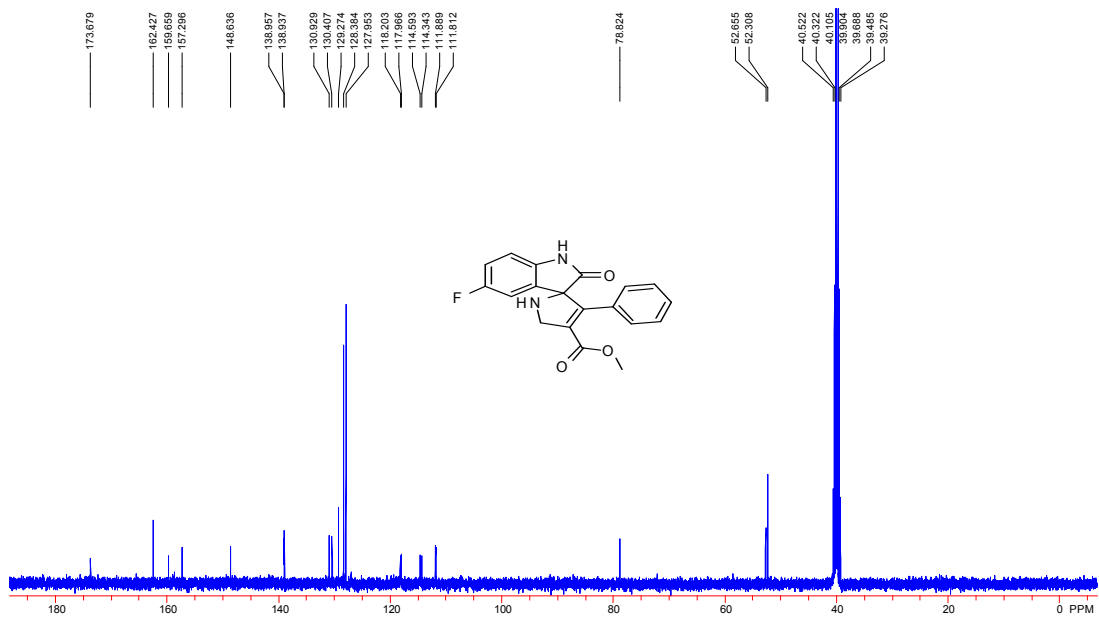

# <sup>1</sup>H NMR and <sup>13</sup>C NMR Spectra of Compound 4s

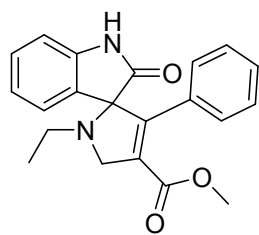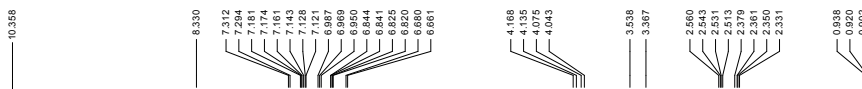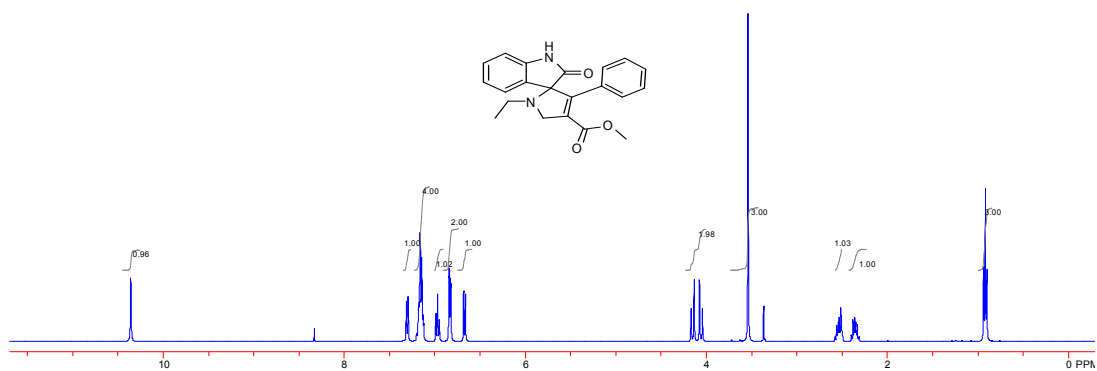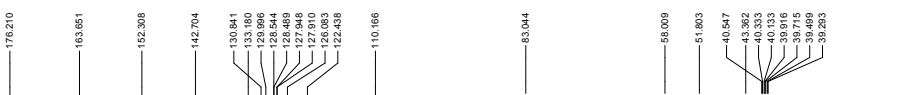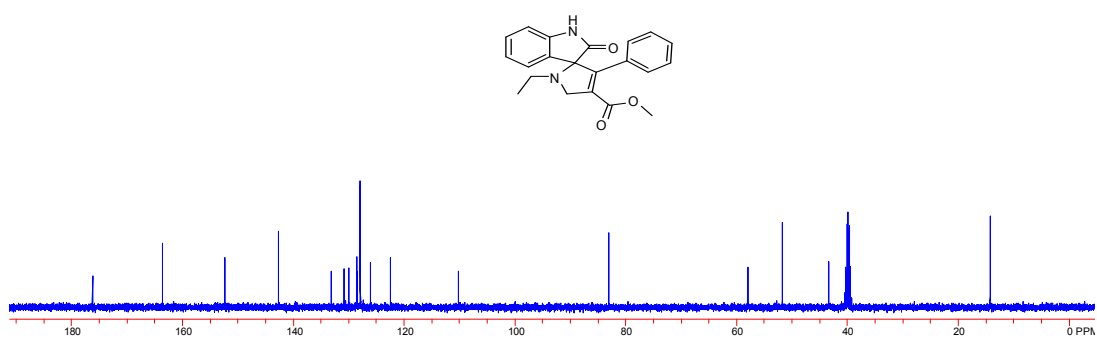

# <sup>1</sup>H NMR and <sup>13</sup>C NMR Spectra of Compound 4t

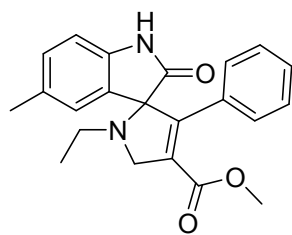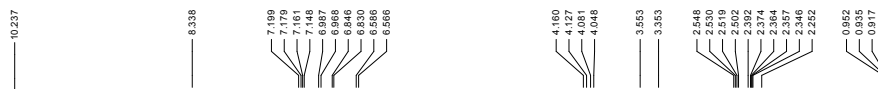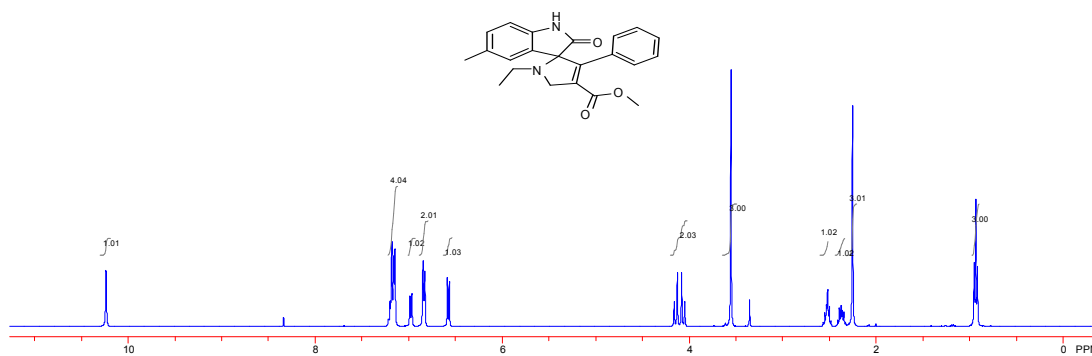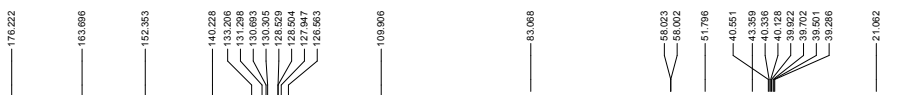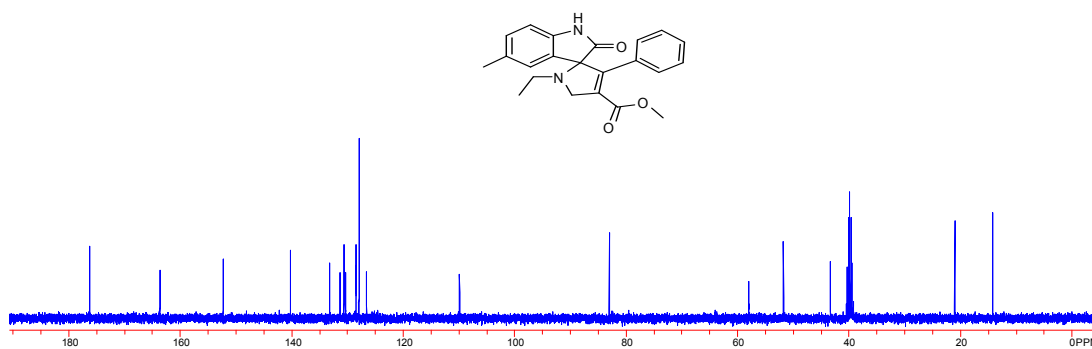

# <sup>1</sup>H NMR and <sup>13</sup>C NMR Spectra of Compound 4u

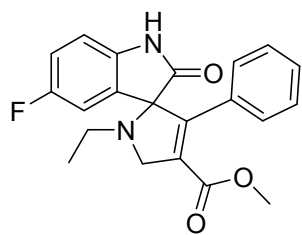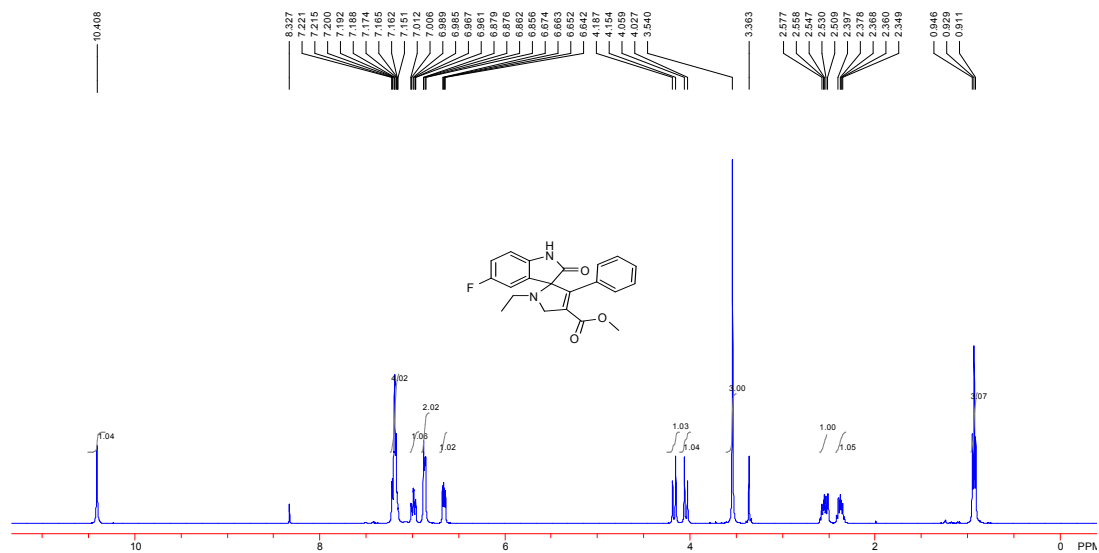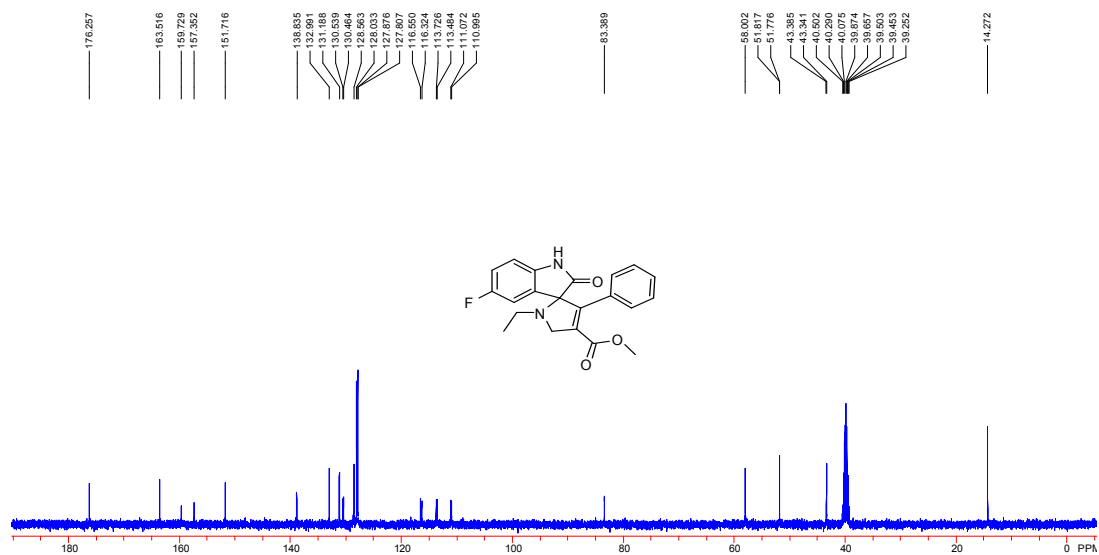

# <sup>1</sup>H NMR and <sup>13</sup>C NMR Spectra of Compound 4v

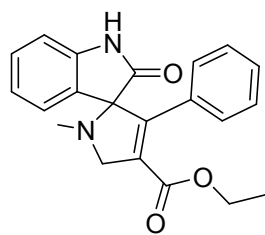

10.387

7.304  
7.286  
7.268  
7.185  
7.149  
7.134  
6.990  
6.953  
6.869  
6.853  
6.808  
6.076

4.089  
4.009  
3.992  
3.975  
3.957  
3.396

2.237  
2.166

0.985  
0.968  
0.950

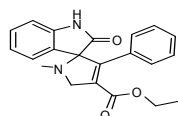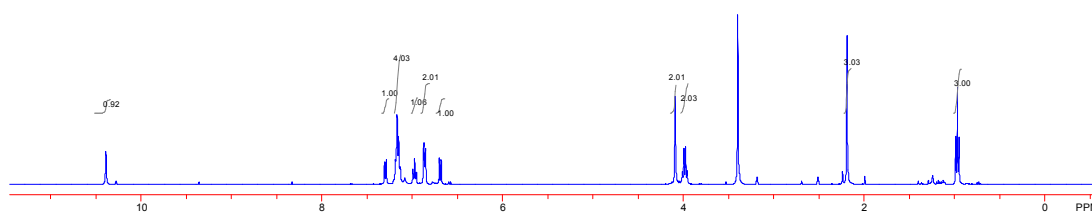

175.873

163.248

152.171

142.885

133.620

131.817

128.442

128.084

127.921

126.184

122.478

115.643

110.190

83.348

60.389

60.210

46.637

40.327

40.115

38.909

38.701

38.491

38.279

35.092

14.047

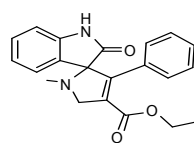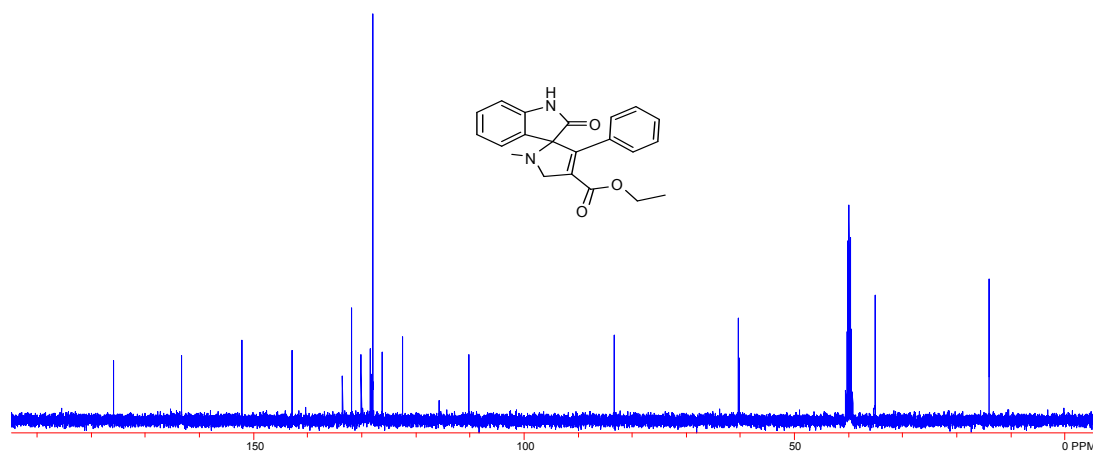



# <sup>1</sup>H NMR and <sup>13</sup>C NMR Spectra of Compound 4w

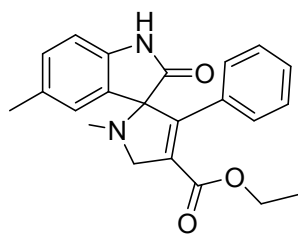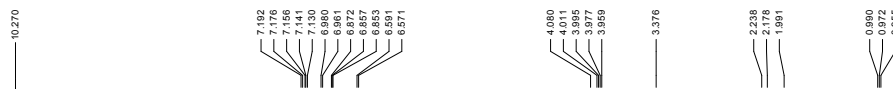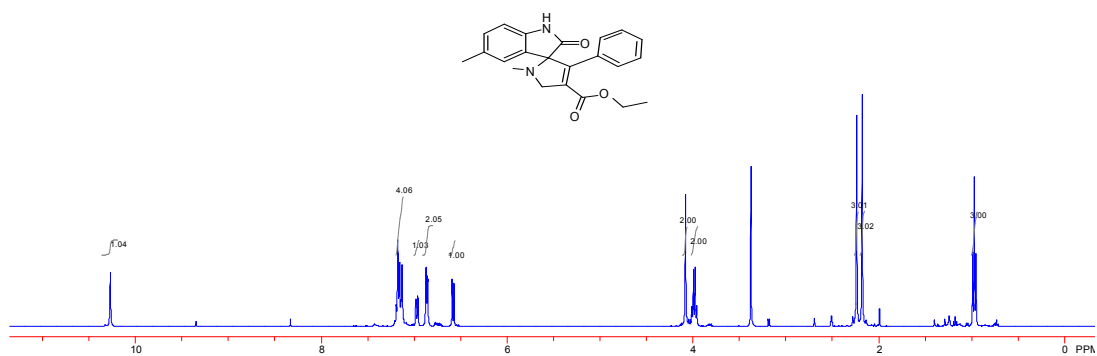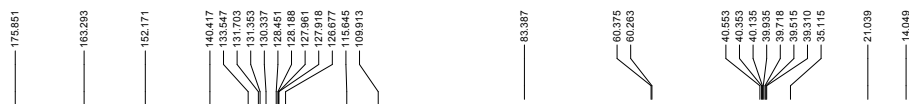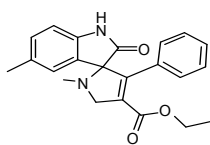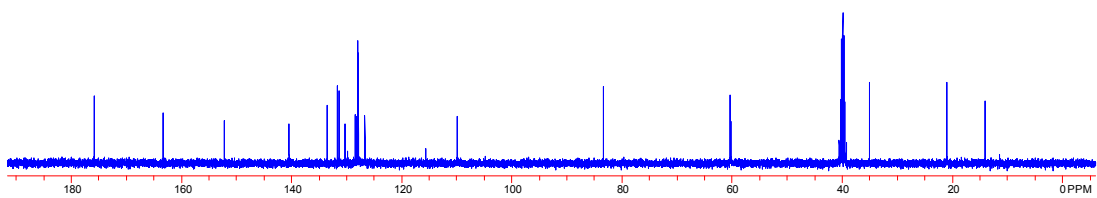

# <sup>1</sup>H NMR and <sup>13</sup>C NMR Spectra of Compound 4x

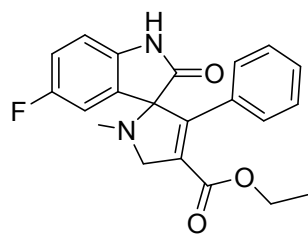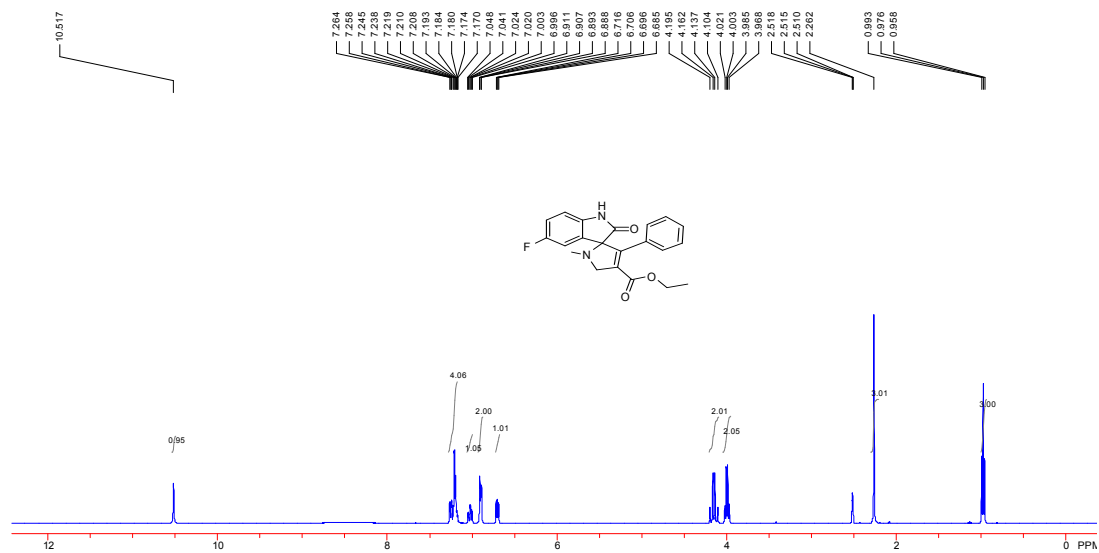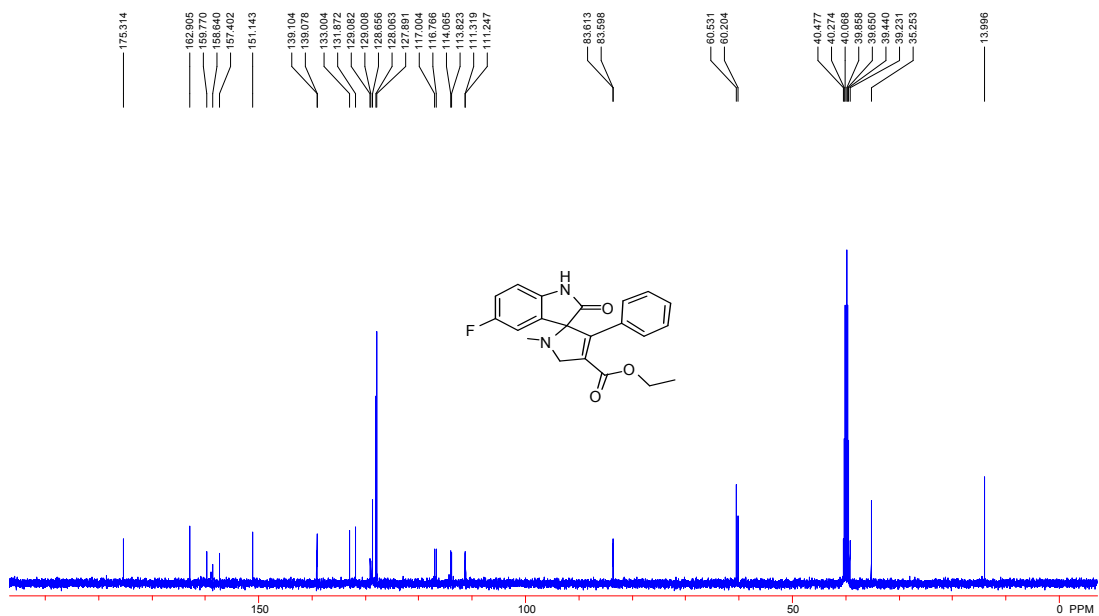

# <sup>1</sup>H NMR and <sup>13</sup>C NMR Spectra of Compound 4y

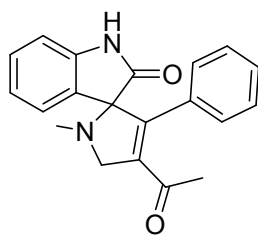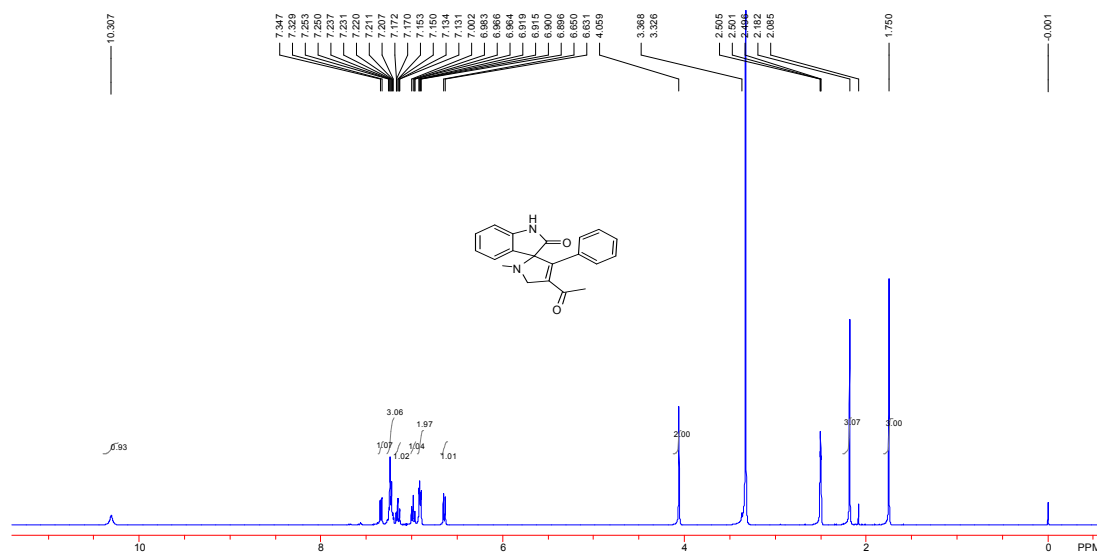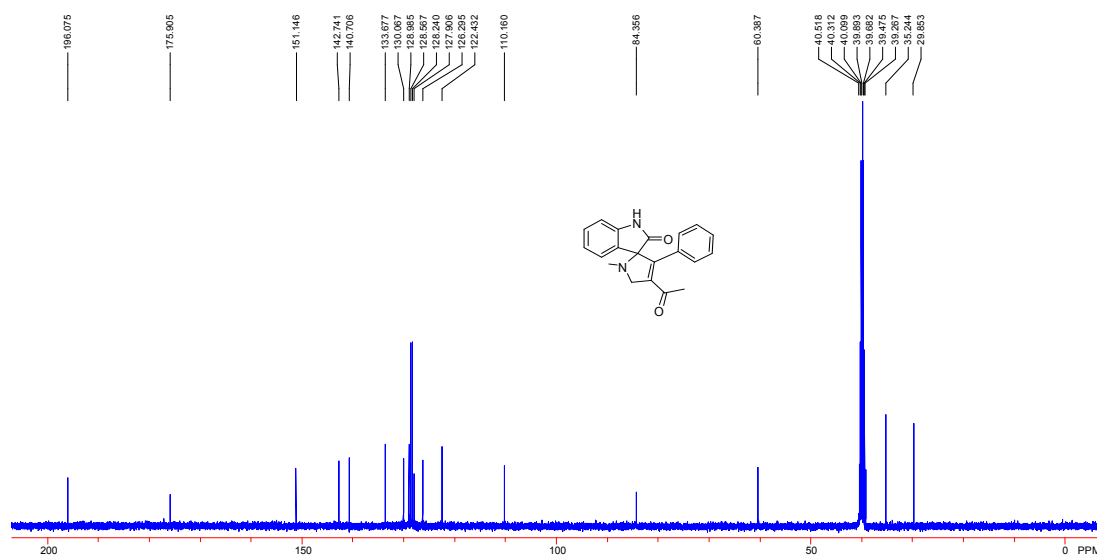

# <sup>1</sup>H NMR and <sup>13</sup>C NMR Spectra of Compound 4z

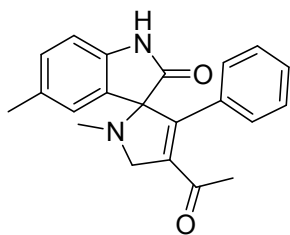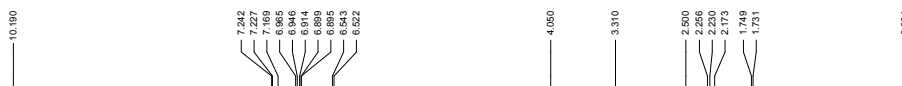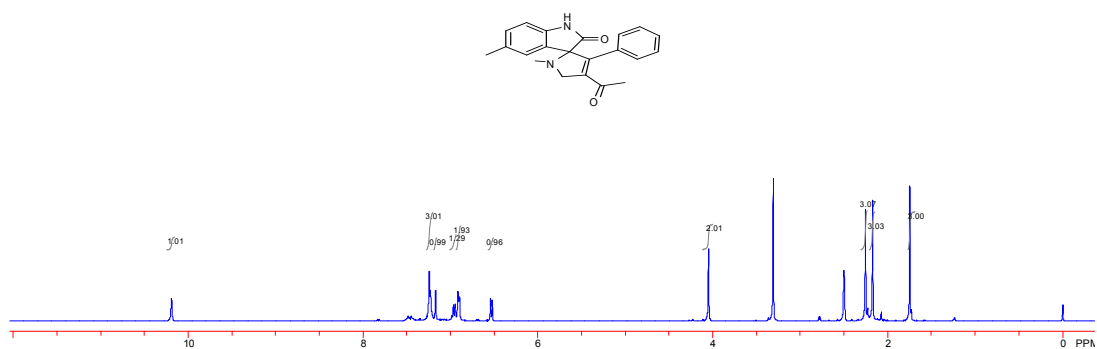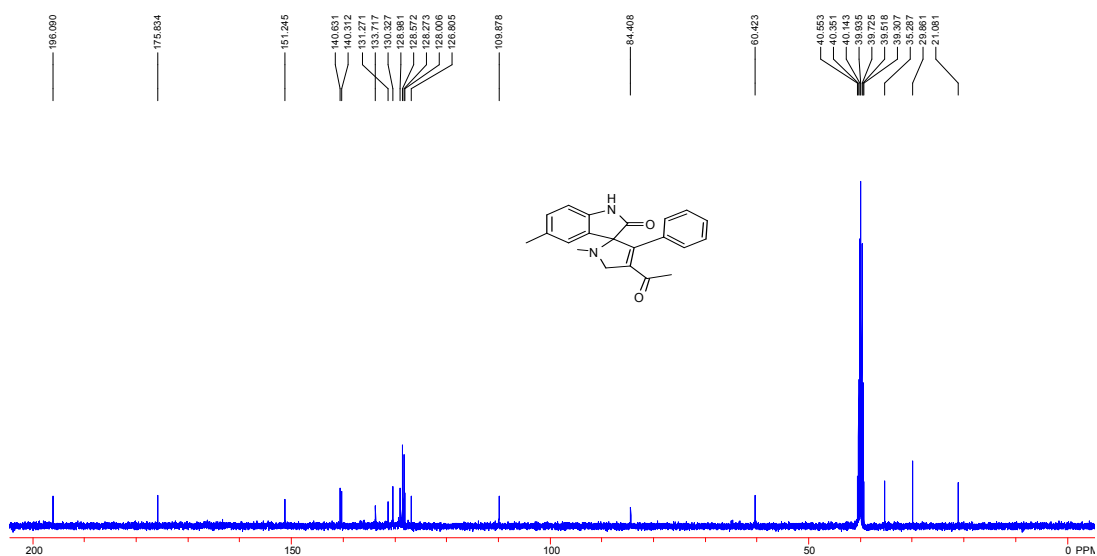

# <sup>1</sup>H NMR and <sup>13</sup>C NMR Spectra of Compound 4aa

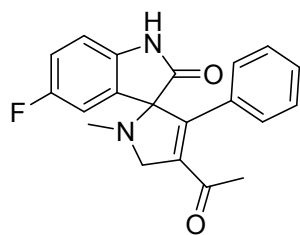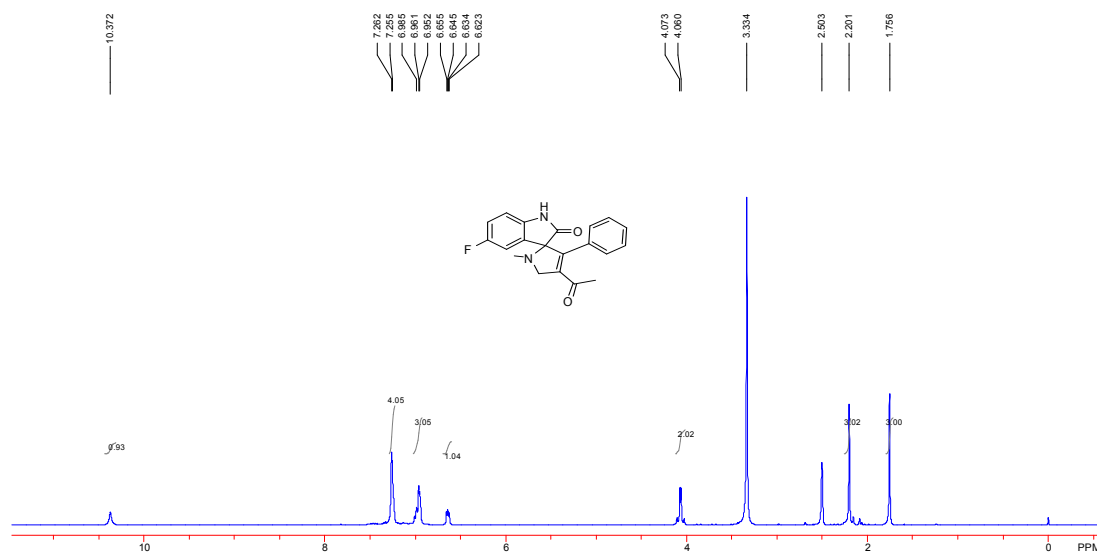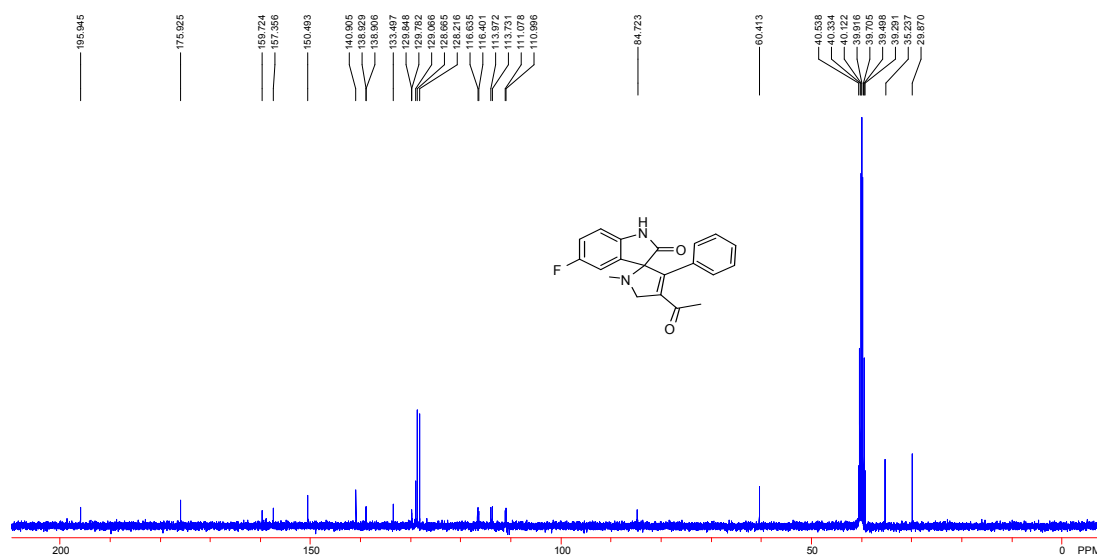

Supplement: c5ra23860a1.pdf [file c5ra23860a1.pdf]
